# Supplementary material for: School and non‐school day screen time profiles and their differences in health and educational indicators in adolescents
Source: PubMed Central journal article supplement (PMC9796428; doi:10.1111/sms.14214), 2022-07-27

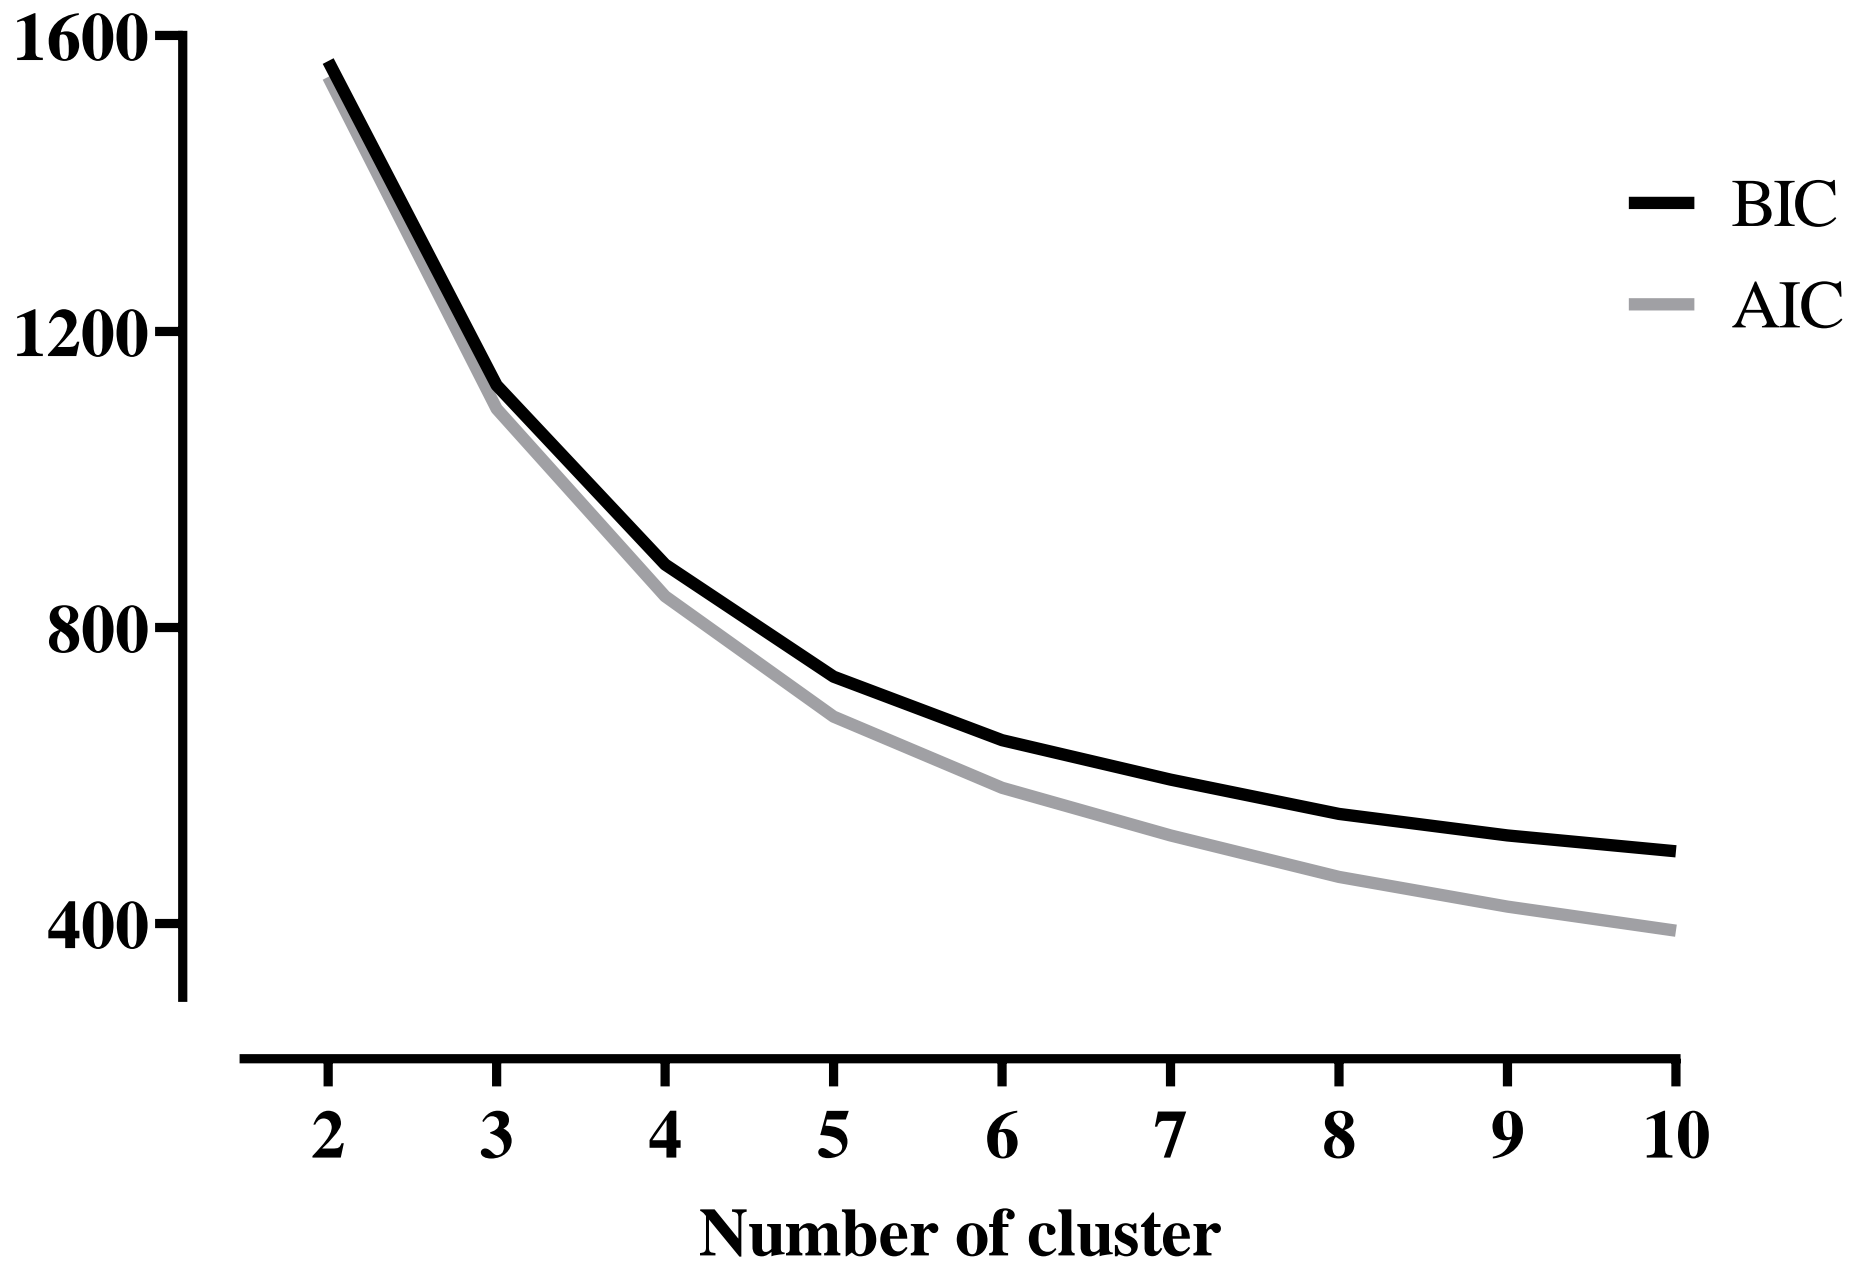

Supplement: SMS-32-1668-s001.pdf [file SMS-32-1668-s001.pdf]
